# Supplementary material for: Intrinsic Disorder in BAP1 and Its Association with Uveal Melanoma
Source: MDPI journal article supplement (doi:10.3390/genes13101703), 2022-09-22
Supplement: s1 [file s1]

**Figure S1. BAP1's amino acid sequence.** Shown in FASTA format, the protein sequence represents BAP1 canonical form. The protein contains 729 residues.

```
>sp|Q92560|BAP1_HUMAN Ubiquitin carboxyl-terminal hydrolase BAP1 OS=Homo sapiens OX=9606 GN=BAP1
PE=1 SV=2
MNKGWLELESDPGLFTLLVEDFGVKGVQVEEIYDLQSKCQGPVYGFIFLFWIEERRSRKVVSTLVDDTSVIDDDIVN
NMFFAHQLIPNSCATHALLSVLLNCSSVDLGPTLSRMKDFTKGFSPESKGYAIGNAPELAKAHNSHARPEPRHLPEK
QNGLSAVRTMEAFHFVSYPITGRLFELDGLKVYPIDHGPWGEDEEWDKARRVIMERIGLATAGEPYHDIRFNLNLM
AVVPDRRIKYEAREHLVVKVNRQTVLEALQQLIRVTQPELIQTHKSQESQLPEESKSASNKSPVLLEANRAPAAASEGN
HTDGAEEAAGSCAQAPSHSPNPKPLVVKPPGSSLNGVHPNPTPIVQRLPAFLDNHNYAKSPMQEEEDLAAGVGR
SRVPVRPPQQYSDDDDYEDDEEDDVQNTNSALRYKGKGTGKPGALSGSADGQLSVLQPNNTINVLAEKLKESQKDL
SIPLSIKTSSGAGSPAVAVPHTSQSPSTPSNESTDTASEIGSAFNSPLRSPIRSANPTRPSSPVTSHISKVLFGEEDSLLRVD
CIRYNRAVRDLGPVISTGLLHLAEDGVLSPALTEGGKGSSPSIRPIQGSQSSSPVEKEVVEATDSREKTGMVRPGEPL
SGEKYSPKELLALLKCVEAEIANYEACLKEEVEKRKKFKIDDQRRTHNYDEFICTFISMLAQEGMLANLVEQNISVRR
RQGVSIGRLHKQRKPD RRKRSRPYKAKRQ
```

**Table S1. UM-related mutations in human *BAP1* gene and local disorder predisposition at sites of mutations in BAP1 protein.** \*Table starts on next page\*.

| ID      | DNA change <sup>a</sup> |               | Protein change <sup>a</sup> | Predicted effect on protein    | Predicted pathogenic effect <sup>a</sup> | Local intrinsic disorder predisposition <sup>a</sup> | Reference |
|---------|-------------------------|---------------|-----------------------------|--------------------------------|------------------------------------------|------------------------------------------------------|-----------|
| UM 44   | exon 1                  | c.3G>A        | p.Met1Ile                   | misense:<br>start site<br>lost | LP                                       | 0.8174                                               | [42]      |
| UM 9    | exon 2                  | c.40_52del13  | p.Leu14SerfsTer54           | truncating                     | P                                        | 0.1864                                               | [42]      |
| UM 1136 | exon 2                  | c.58_59insTG  | p.Glu20ValfsTer53           | truncating                     | P                                        | 0.1198                                               | [42]      |
| UM 584  | exon 3                  | c.79delG      | p.Val27CysfsTer45           | truncating                     | P                                        | 0.2189                                               | [42]      |
| UM 17   | exon 3                  | c.82C>T       | p.Gln28Ter                  | truncating                     | P                                        | 0.2405                                               | [42]      |
| UM 1207 | exon 3                  | c.91_93delGAG | p.Glu31del                  | in-frame<br>deletion           | LP                                       | 0.2474                                               | [42]      |
| NB 071M | exon 3                  | c.271C>T      | p.Gln36Ter                  | truncating                     |                                          | 0.2827                                               | [21]      |

| ID      | DNA change <sup>a</sup> |                                                                                                                                                                                    | Protein change <sup>a</sup> | Predicted effect on protein | Predicted pathogenic effect <sup>a</sup> | Local intrinsic disorder predisposition <sup>a</sup> | Reference |
|---------|-------------------------|------------------------------------------------------------------------------------------------------------------------------------------------------------------------------------|-----------------------------|-----------------------------|------------------------------------------|------------------------------------------------------|-----------|
| UM 75   | exon 4                  | c.125_145del21                                                                                                                                                                     | p.Pro42_Phe48del            | in-frame deletion           | LP                                       | 0.051±0.036 <sup>c</sup>                             | [42]      |
| MM 120  | exon 4                  | c.259delC                                                                                                                                                                          | p.Phe48fsTer22              | truncating                  |                                          | 0.0205                                               | [21]      |
| UM 88   | exon 4                  | c.145delC                                                                                                                                                                          | p.Leu49CysfsTer23           | truncating                  | P                                        | 0.0297                                               | [42]      |
| MM 144  | exon 4                  | delG                                                                                                                                                                               | p.Phe50LeufsTer22           | truncating                  |                                          | 0.0449                                               | [41]      |
| UM 877  | exon 4                  | c.165_180del16                                                                                                                                                                     | p.Arg57SerfsTer10           | truncating                  | P                                        | 0.4857                                               | [42]      |
| UM 13   | exon 4                  | c.178C>T                                                                                                                                                                           | p.Arg60Ter                  | truncating                  | P                                        | 0.5870                                               | [42]      |
| UM_62   | exon 4                  | c.202_227del26                                                                                                                                                                     | p.Asp68CysfsTer3            | truncating                  | P                                        | 0.4115                                               | [42]      |
| UMM 004 | exon 4                  | T>C                                                                                                                                                                                | p.Asp68Gly                  | missense                    |                                          | 0.4115                                               | [41]      |
| UM 119  | exon 4                  | c.253C>T                                                                                                                                                                           | p.Gln85Ter                  | truncating                  | P                                        | 0.1426                                               | [42]      |
| UM 106  | exon 4                  | c.254A>C                                                                                                                                                                           | p.Gln85Pro                  | missense                    | P                                        | 0.1426                                               | [42]      |
| UMM 006 | exon 5                  | delTGTGAGCCAGGATGAAGGCA<br>CTGCAGCCTACCTCAGGGCTGA<br>AACCCTTGGTGAAGTCCTTCATG<br>CGACTCAGGGTGGGTCCCAGGTC<br>CACGCTGCTGCAGTTCAGGAGCA<br>CGCTCAGCAAGGCATGAGTTGCA<br>CAAGAGTTGGGTATCAG | p.Leu86_Glu125del           | in-frame deletion           |                                          | 0.34±0.17                                            | [41]      |
| UM 1126 | exon 5                  | c.295_312del18                                                                                                                                                                     | p.Val99_Ser104del           | in-frame deletion           | LP                                       | 0.187±0.033                                          | [42]      |
| MM 129  | exon 5                  | A>C                                                                                                                                                                                | p.Leu101Arg                 | missense                    |                                          | 0.16395                                              | [41]      |
| MM 090  | exon 5                  | c.467_487del21                                                                                                                                                                     | p.Asp117fs48                | truncating                  |                                          | 0.1491                                               | [21]      |

| ID       | DNA change <sup>a</sup> |                | Protein change <sup>a</sup> | Predicted effect on protein | Predicted pathogenic effect <sup>a</sup> | Local intrinsic disorder predisposition <sup>a</sup> | Reference |
|----------|-------------------------|----------------|-----------------------------|-----------------------------|------------------------------------------|------------------------------------------------------|-----------|
| MM 121   | exon 6                  | c.497G>C       | p.Glu128Arg                 | missense                    | LP                                       | 0.6465                                               | [21]      |
| UM 56    | exon 6                  | c.422A>G       | p.His141Arg                 | missense                    | LP                                       | 0.7665                                               | [42]      |
| MM 173   | exon 7                  | C>A            | p.Arg146Met                 | missense                    |                                          | 0.7776                                               | [41]      |
| UM 58    | exon 7                  | c.458_459delCT | p.Pro153ArgfsTer7           | truncating                  | P                                        | 0.6711                                               | [42]      |
| NB 191   | exon 7                  | c.610-634del25 | p.Met165fsTer12             | truncating                  |                                          | 0.2419                                               | [21]      |
| UM 114   | exon 7                  | c.497_509del13 | p.Glu166ValfsTer17          | truncating                  | P                                        | 0.2958                                               | [42]      |
| UM 51    | exon 7                  | c.506A>C       | p.His169Pro                 | missense                    | P                                        | 0.1251                                               | [42]      |
| MM 125   | exon 7                  | c.622C>G       | p.His169Gln                 | missense                    |                                          | 0.1251                                               | [21]      |
| NB 200   | exon 7                  | c.631C>G       | p.Ser172Arg                 | missense                    |                                          | 0.0900                                               | [21]      |
| UM 1118  | exon 7                  | c.524C>G       | p.Pro175Arg                 | missense                    | LP                                       | 0.0867                                               | [42]      |
| UMM 010  | exon 8                  | delC           | p.Leu186Ter                 | truncating                  |                                          | 0.1772                                               | [41]      |
| UM 60    | exon 8                  | c.588G>A       | p.Trp196Ter                 | truncating                  | P                                        | 0.4656                                               | [42]      |
| UM _1334 | exon 8                  | c.619delC      | p.Arg207GlyfsTer24          | truncating                  | P                                        | 0.2719                                               | [42]      |
| UM 35    | exon 9                  | c.723T>A       | p.Tyr241Ter                 | truncating                  | P                                        | 0.2819                                               | [42]      |
| MM 060   | exon 9                  | c.872C>T       | p.Gln253Ter                 | truncating                  |                                          | 0.2764                                               | [21]      |
| UM 107   | exon 9                  | c.781C>T       | p.Gln261Ter                 | truncating                  | P                                        | 0.4608                                               | [42]      |
| UMM 009  | exon 9                  | delA           | p.Leu262Argfs*2             | truncating                  |                                          | 0.5003                                               | [41]      |

| ID      | DNA change <sup>a</sup> |                           | Protein change <sup>a</sup> | Predicted effect on protein | Predicted pathogenic effect <sup>a</sup> | Local intrinsic disorder predisposition <sup>a</sup> | Reference |
|---------|-------------------------|---------------------------|-----------------------------|-----------------------------|------------------------------------------|------------------------------------------------------|-----------|
| MM 066  | exon 10                 | c.960_968del9             | p.Glu284-Ser285del          | in-frame deletion           |                                          | 0.9585±0.0005                                        | [21]      |
| MM 175  | exon 10                 | delAGCACCAGCGGGGACTTGTTG  | p.Ser289ArgfsTer41          | truncating                  |                                          | 0.9591                                               | [41]      |
| MM 161  | exon 10                 | delCT                     | p.Arg300GlyfsTer6           | truncating                  |                                          | 0.9591                                               | [41]      |
| UM 46   | exon 10                 | c.904_905insT             | p.Pro302LeufsTer5           | truncating                  | P                                        | 0.9596                                               | [42]      |
| MM 070  | exon 11                 | c.1083-1093delCCCCATCCCAC | p.Gln322fsTer100            | truncating                  |                                          | 0.9535                                               | [21]      |
| UM 1029 | exon 12                 | c.1134_1143del10_insAA    | p.Ala379ArgfsTer16          | truncating                  | P                                        | 0.7391                                               | [42]      |
| UM 115  | exon 12                 | c.1153C>T                 | p.Arg385Ter                 | truncating                  | P                                        | 0.8348                                               | [42]      |
| UM 55   | exon 12                 | c.1175_1182delAGCAGTAC    | p.Gln392LeufsTer3           | truncating                  | P                                        | 0.9109                                               | [42]      |
| UM 863  | exon 12                 | c.1192G>T                 | p.Glu398Ter                 | truncating                  | P                                        | 0.9463                                               | [42]      |
| UMM 007 | exon 12                 | A>T                       | p.Tyr401Ter                 | truncating                  |                                          | 0.9478                                               | [41]      |
| UM 950  | exon 12                 | c.1203dupT                | p.Glu402Ter                 | truncating                  | P                                        | 0.9457                                               | [42]      |
| UM 69   | exon 12                 | c.1217_1220delAGGA        | p.Glu406ValfsTer23          | truncating                  | P                                        | 0.9264                                               | [42]      |
| UM 1333 | exon 13                 | c.1695dupT                | p.Glu566Ter                 | truncating                  | P                                        | 0.3981                                               | [42]      |
| MM 110  | exon 13                 | c.182901833delCCCCCT      | p.Ser571fsTer25             | truncating                  |                                          | 0.4695                                               | [21]      |
| UM 48   | exon 13                 | c.1729G>C                 | p.Glu577Gln                 | missense                    | P                                        | 0.6967                                               | [42]      |

| ID      | DNA change <sup>a</sup> |                                             | Protein change <sup>a</sup> | Predicted effect on protein  | Predicted pathogenic effect <sup>a</sup> | Local intrinsic disorder predisposition <sup>a</sup> | Reference |
|---------|-------------------------|---------------------------------------------|-----------------------------|------------------------------|------------------------------------------|------------------------------------------------------|-----------|
| UMM 002 | exon 14                 | delGGCTGCTGGACCCCTGGCTGCCTTGGATTGGTCTGATGGA | p.Ser585Glnfs*19            | frame-shift deletion         |                                          | 0.8770                                               | [41]      |
| MM 004  | exon 14                 | T>A                                         | p.Gln590Leu                 | missense                     |                                          | 0.9358                                               | [41]      |
| UM 61   | exon 14                 | c.1881C>G                                   | p.Tyr627Ter                 | truncating                   | P                                        | 0.7660                                               | [42]      |
| UM 74   | exon 14                 | c.1882_1885delTCAC                          | p.Ser628ProfsTer8           | truncating                   | P                                        | 0.7533                                               | [42]      |
| UM 708  | intron 14-3'UTR         | c.1890+38_2573del                           | p.Glu631Ter                 | truncating (3 exon deletion) | P                                        | 0.6899                                               | [42]      |
| NB 185  | exon 15                 | c.2006-2017del12                            | p.Glu631_Ala634del          | in-frame deletion            |                                          | 0.619±0.054                                          | [21]      |
| MM 046  | exon 15                 | c.2026_2928delGTG                           | p.Lys637_Cys638delinsN      | in-frame deletion            |                                          | 0.561±0.003                                          | [21]      |
| UM 1113 | exon 15                 | c.1926_1951del 26                           | p.Ile643GlyfsTer12          | truncating                   | P                                        | 0.4603                                               | [42]      |
| UM 104  | exon 15                 | c.1932_1948del17                            | p.Asn645GlnfsTer13          | truncating                   | P                                        | 0.4055                                               | [42]      |
| UM 804  | exon 16                 | c.1986_1989delTGAT                          | p.Ile662MetfsTer29          | truncating                   | P                                        | 0.6474                                               | [42]      |
| NN 128  | exon 16                 | c.211202129delGAAGGACCC                     | p.Arg666_His669del          | in-frame deletion            |                                          | 0.399±0.063                                          | [21]      |
| UM 108  | exon 16                 | c.2015A>G                                   | p.Asp672Gly                 | missense                     | LP                                       | 0.1914                                               | [42]      |
| MM 152M | exon 17                 | c.2195_2220del26                            | p.Glu693fsTer12             | truncating                   |                                          | 0.3648                                               | [21]      |

<sup>a</sup>The DNA and protein changes are sourced from a previous studies (cited in last column).

<sup>b</sup>Local intrinsic disorder predisposition was evaluated by PONDR® VSL2 [49, 50].

<sup>c</sup>In cases of the in-frame deletion mutations removing more than one residues, an average disorder score was calculated for the entire deleted region.
